Structural bioinformatics

# eMolTox: prediction of molecular toxicity with confidence

Changge Ji<sup>1,2,\*</sup>, Fredrik Svensson<sup>2,3</sup>, Azedine Zoufir<sup>2</sup> and Andreas Bender<sup>2,\*</sup>

<sup>1</sup>Shanghai Engineering Research Center for Molecular Therapeutics and New Drug Development, School of Chemistry and Molecular Engineering, East China Normal University, Shanghai 200062, China, <sup>2</sup>Department of Chemistry, Center for Molecular Informatics, Cambridge CB2 1EW, UK and <sup>3</sup>IOTA Pharmaceuticals, St John's Innovation Centre, Cambridge CB4 0WS, UK

\*To whom correspondence should be addressed.

Associate Editor: Alfonso Valencia

Received on September 7, 2017; revised on January 31, 2018; editorial decision on March 4, 2018; accepted on March 6, 2018

## Abstract

**Summary:** In this work, we present eMolTox, a web server for the prediction of potential toxicity associated with a given molecule. A total of 174 toxicology-related *in vitro/vivo* experimental datasets were used for model construction and Mondrian conformal prediction was used to estimate the confidence of the resulting predictions. Toxic substructure analysis is also implemented in eMolTox. eMolTox predicts and displays a wealth of information of potential molecular toxicities for safety analysis in drug development.

**Availability and implementation:** The eMolTox Server is freely available for use on the web at <http://xundrug.cn/moltox>.

**Contact:** [chicago.ji@gmail.com](mailto:chicago.ji@gmail.com) or [ab454@cam.ac.uk](mailto:ab454@cam.ac.uk)

**Supplementary information:** [Supplementary data](#) are available at *Bioinformatics* online.

## 1 Introduction

Drug-mediated toxicity is a heavy burden to the pharmaceutical industry, contributing to safety-related failures in development and the high cost of drug discovery (Cook *et al.*, 2014). In the past years and decades, many biological methods were developed to test the potential toxicity of chemical compounds, including biochemical assays, cellular assays and model-organ systems. These data are now also publicly available on a large scale (Knudsen *et al.*, 2015), and while coverage of chemical space and consistency of measurements may not in every case be ideal we believe that still the time has come to now model such data on a large scale and to provide a public webservice to do so.

In this work, we present eMolTox, a publicly available web server for prediction of different kinds of toxic endpoints from toxicology related *in vitro/in vivo* experimental data and analysis of toxic substructure.

## 2 Materials and methods

Various types of safety data are generated *in vitro* and *in vivo* (in animals and in humans), and this data can now be used to predict the

toxicity potential of a drug candidate at an early stage (Blomme and Will, 2016). In our current work, we have collected different types of toxicology data from public databases and literature, including off-target functional assays, cytotoxicity tests, mutagenicity tests, CYP450 inhibition assays, acute oral toxicity assays, transporter assays and so on. A total of 174 datasets were extracted in total, details of which are listed in [Supplementary Table S1](#); 2048 bit ECFP\_4 circular Morgan fingerprints and 196 different physiochemical descriptors (see [Supplementary Text S3](#)) generated by RDKit (Landrum, 2006) were used for building each of the prediction model. Models were generated using random forests and conformal prediction.

QSAR models built from machine learning methods often meet with the problem of a poor understanding of the confidence of the prediction for the compound of interest (Norinder *et al.*, 2014). There is no guarantee that a quantitative structure-activity relationship (QSAR) model can predict all molecules in the chemical space with high confidence; however, a model that is aware what it can and what it cannot predict (with a given confidence value) is already of significant practical value. The conformal prediction (CP)

framework is a recent development in machine learning (Shafer and Vovk, 2008) that can associate a reliable measure of confidence with a given prediction using known data in the form of an additional calibration set.

CP can be implemented as a simple wrapper to existing classifiers or regression algorithms. CP uses part of the training dataset as a calibration set to calculate  $P$ -values for each possible class label through the ranking of nonconformity. The conformal predictors output predictions together with an associated  $P$ -value, and a low  $P$ -value is interpreted as the label being unlikely (see Supplementary Text S1) and it can be disregarded by the user.

For a given compound, a conformal predictor gives the  $P$ -value for active and inactive classes as  $p_1$  and  $p_0$ , respectively. The output label under significance level  $\varepsilon$  can be defined as:

$$\text{Active : } p_1 > \varepsilon \text{ and } p_0 \leq \varepsilon$$

$$\text{Inactive : } p_0 > \varepsilon \text{ and } p_1 \leq \varepsilon$$

$$\text{Uncertain : } p_1 > \varepsilon \text{ and } p_0 > \varepsilon, p_1 \leq \varepsilon \text{ and } p_0 \leq \varepsilon$$

We use efficiency and validity to evaluate the performance of confidence estimation for the conformal predictor. Efficiency is defined as the single label prediction rate at a given significance value. The conformal confidence prediction was said to be valid if the frequency of errors was less than  $\varepsilon$  at a chosen confidence level  $1 - \varepsilon$ . There is a chance that a test molecule may have an undefined label under conformal prediction, which is termed 'inefficient prediction'. More detailed information about model construction and evaluation is provided in Supplementary Text S2.

Apart from data driven predictors, eMolTox also includes a toxic substructure analysis. Structural alerts (also known as toxicophors/toxic fragments) are chemical substructures that indicate or associate to specific toxic endpoints. Structural alerts are widely accepted in chemical toxicology and regulatory decision-making. We collected different kinds of public available structural alerts (Supplementary Table S2) and analyzed whether a query compound contain a specific toxic substructure.

### 3 Results

The efficiencies and validities of selected datasets (see Supplementary Table S3 for complete list) are listed in Table 1 and show that Mondrian CP gives similar prediction accuracy for both active and inactive sets where validity values are around 0.90 (which is the expected value,  $1 - \varepsilon$ ) at a significance level of 0.1. One parameter in CP is that efficiency and validity are dependent on the significance value chosen, where high confidence may lead to high rate of undefined labels in the predictions. We investigated model performances at different significance levels (see Supplementary Table S3). The average efficiency at a significance level of 0.05, 0.10 and 0.20 is 0.65, 0.76 and 0.85, respectively. Hence, for the balance of efficiency and validity, we use 0.1 as the default significance level in eMolTox webserver. The users can also input the significance level manually which they prefer to use for their analyses.

### 4 Web server

#### 4.1 Interface features

The eMolTox web server offers the user many ways to submit query molecules, namely SMILES strings, IUPAC name, commercial name, CAS ID, InChI key or drawing a molecule. The results page of eMolTox (Supplementary Figs. S1 and S2) is composed of two main sections: First, a table of all potential active endpoints the query

**Table 1.** Performance of conformal predictor for the selected eight datasets at a significance level  $\varepsilon = 0.10$

| Biological action                   | Efficiency | Validity (positive set) | Validity (negative set) |
|-------------------------------------|------------|-------------------------|-------------------------|
| Modulator of $\beta$ -1 AR          | 0.92       | 0.89                    | 0.91                    |
| Modulator of HERG                   | 0.83       | 0.94                    | 0.90                    |
| Disrupt mitochondria                | 0.82       | 0.94                    | 0.90                    |
| Block BSEP Pump                     | 0.86       | 0.92                    | 0.88                    |
| High acute rat oral tox             | 0.86       | 0.83                    | 0.91                    |
| Mutagenicity                        | 0.72       | 0.90                    | 0.90                    |
| Carcinogenic potency                | 0.55       | 0.98                    | 0.88                    |
| Inhibitors/substrates of CYP450 3A4 | 0.87       | 0.92                    | 0.89                    |

compound might have, together with the confidence of each prediction. The structure of the most similar active compound in the database is also shown to rationalize predictions. Second, eMolTox provides a table showing all matched toxic or reactive substructures highlighted on the molecule supplied together with the potential toxicity label. In addition, the full prediction result is provided as a compressed csv file for download, including a full result table with both positive and negative predictions. Molecules predicted to have undefined label are labeled as 'Inconclusive'. All training dataset used for model building are furthermore available for download from the web server.

#### 4.2 Implementation

The web server uses node.js code to run the interface functionality and Python code to perform prediction and analysis. Models were developed using Python, Scikit-learn version 0.18 (Pedregosa *et al.*, 2011) and the nonconformist package (Linusson, 2017). RDKit (Landrum, 2006) is used for generating molecular fingerprints, matching structural alerts and drawing molecule picture. Chemical Identifier Resolver is used for converting molecular name and CAS id to SMILES strings.

### Acknowledgement

We thank Dr Dezső Modos for helpful discussions.

### Funding

This work was supported by National Key Research and Development Plan [2016YFA0501700], National Natural Science Foundation of China [grant nos. 21003048 and 21433004], Shanghai Natural Science Foundation [grant no. 14ZR1411900] and China Scholarship Council for financial support.

*Conflict of Interest:* none declared.

### References

- Blomme, E.A.G. and Will, Y. (2016) Toxicology strategies for drug discovery: present and future. *Chem. Res. Toxicol.*, **29**, 473–504.
- Cook, D. *et al.* (2014) Lessons learned from the fate of AstraZeneca's drug pipeline: a five-dimensional framework. *Nat. Rev. Drug Discov.*, **13**, 419–431.
- Knudsen, T.B. *et al.* (2015) FutureTox II: in vitro data and in silico models for predictive toxicology. *Toxicol. Sci.*, **143**, 256–267.
- Landrum, G. (2006) RDKit: Open-source cheminformatics. <http://www.rdkit.org>.
- Linusson, H. (2017) Nonconformist. <https://github.com/donlnz/nonconformist>.
- Norinder, U. *et al.* (2014) Introducing conformal prediction in predictive modeling. A transparent and flexible alternative to applicability domain determination. *J. Chem. Inform. Model.*, **54**, 1596–1603.
- Pedregosa, F. *et al.* (2011) Scikit-learn: machine learning in Python. *J. Mach. Learn. Res.*, **12**, 2825–2830.
- Shafer, G. and Vovk, V. (2008) A tutorial on conformal prediction. *J. Mach. Learn. Res.*, **9**, 371–421.
